# Supplementary material
Source: PubMed Central journal article supplement (PMC6322681)
Supplement: NIHMS1512943-supplement-2.pdf [file NIHMS1512943-supplement-2.pdf]

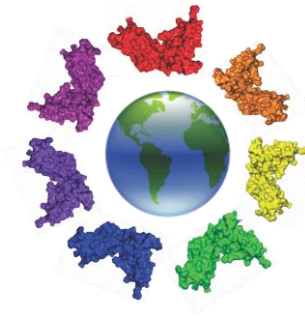

## **KIR component**

**Breakout session 1**  
Thursday 10AM-12PM  
Room: Heather

17<sup>th</sup> Workshop KIR component population reports

**Jan Hoffman**

“SNP analysis of ~200,000 KIR typed samples”

**Clara Gorodezky**

“Distribution of KIR3DL1-3DS1 and its ligands in Mexican Mestizos from Mexico City.”

**Gonzalo Montero Martin**

“KIR diversity in a Spanish Population”

**Maneesh Misra**

“KIR diversity in an Egyptian Population”

**Neda Nemat-Gorgani**

“KIR diversity of 1000 Europeans”

**Danillo Augusto**

“KIR2DL1 and KIR3DL2 alleles in Brazilian Amerindian and Euro-descendant populations”

**James Traherne**

“High-resolution genotyping of Ugandan mother-baby pairs”

**Derek Middleton**

“Update: KIR in the Allele Frequencies Net Database”

**Open discussion**

## **Breakout session 2**

Thursday 8-9:30PM

Room: Heather

KIR diversity- technical considerations

### **Steve Marsh**

“Update on KIR nomenclature”

### **James Robinson**

“Update on the IPD-KIR database”

### **Will Bultitude**

“NGS of Full-length KIR Genes”

### **Dan Geraghty**

“A reference set of fully sequenced KIR haplotypes ”

### **Wesley Marin**

“PING: A bioinformatics pipeline for analysis of next-generation sequencing KIR data”

### **Jan Hoffman**

“An updated neXtype algorithm for high-throughput KIR genotyping delivering allele-level resolution”

### **Open discussion**
